# Supplementary material for: Performance of a Mobile 3D Camera to Evaluate Simulated Pathological Gait in Practical Scenarios
Source: MDPI journal article supplement (doi:10.3390/s23156944), 2023-08-04
Supplement: s1 [file s1]

systems: 1: robot 2: xsens

conditions: 1: normal; 2: CP; 3: MS; 4: AT

|                                     | P systems |     | P Robot<br>normal vs<br>CP | P Robot<br>normal vs<br>MS | P Robot<br>normal vs<br>AT | P xsens<br>normal vs<br>CP | P xsens<br>normal vs<br>MS | P xsens<br>normal vs<br>AT | P systems<br>normal | P systems<br>CP | P systems<br>MS | P systems<br>AT |
|-------------------------------------|-----------|-----|----------------------------|----------------------------|----------------------------|----------------------------|----------------------------|----------------------------|---------------------|-----------------|-----------------|-----------------|
|                                     |           |     |                            |                            |                            |                            |                            |                            |                     |                 |                 |                 |
| Stepwidthm                          | .211      |     | .000                       | .000                       | .000                       | .000                       | .000                       | .000                       | .093                | .263            | .301            | .784            |
| leftstridelengthm                   | .000      | R>x | .000                       | .032                       | .000                       | .000                       | .002                       | .000                       | .000                | .000            | .000            | .000            |
| leftstridetimes                     | .349      |     | .001                       | .117                       | .023                       | .000                       | .117                       | .024                       | .365                | .187            | .064            | .396            |
| leftsteptimes                       | .000      | R<x | .003                       | .022                       | .006                       | .002                       | .170                       | .070                       | .000                | .039            | .027            | .929            |
| leftcadencestepsmin                 | .000      | R>x | .004                       | .02                        | .004                       | .003                       | .287                       | .165                       | .000                | .024            | .346            | .578            |
| percentageofffootstance             | .001      | R>x | .003                       | .000                       | .001                       | .247                       | .047                       | .037                       | .000                | .023            | .205            | .219            |
| trunktilt.rom                       | .000      | R<x | .000                       | .041                       | .004                       | .090                       | .019                       | .000                       | .000                | .179            | .000            | .000            |
| pelvistilt.rom                      | .000      | R<x | .000                       | .342                       | .425                       | .001                       | .001                       | .000                       | .081                | .035            | .000            | .000            |
| pelvisrot.rom                       | .041      |     | .054                       | .007                       | .128                       | .269                       | .631                       | .962                       | .084                | .050            | .143            | .071            |
| hipabdadd.rom                       | .806      |     | .221                       | .359                       | .855                       | .000                       | .994                       | .367                       | .006                | .001            | .189            | .616            |
| hipflex.rom                         | .290      |     | .000                       | .036                       | .001                       | .000                       | .473                       | .074                       | .019                | .091            | .915            | .300            |
| kneeflex.rom                        | .479      |     | .010                       | .457                       | .009                       | .000                       | .463                       | .000                       | .000                | .000            | .002            | .083            |
| hipmax.extensionduringstancedegree  | .778      |     | .000                       | .006                       | .000                       | .000                       | .254                       | .005                       | .004                | .173            | .705            | .595            |
| hipmax.flexionduringswingdegree     | .053      |     | .000                       | .718                       | .104                       | .000                       | .658                       | .747                       | .820                | .000            | .516            | .990            |
| kneeinitialcontactpositiondegree    | .014      |     | .000                       | .177                       | .000                       | .000                       | .819                       | .000                       | .000                | .000            | .000            | .075            |
| kneemax.flexioninloadresponsedegree | .000      | R>x | .000                       | .777                       | .005                       | .000                       | .880                       | .000                       | .000                | .202            | .000            | .209            |
| kneepositionattoeofdegree           | .000      | R>x | .000                       | .822                       | .019                       | .000                       | .991                       | .000                       | .000                | .022            | .000            | .000            |
| kneemax.flexionduringswingdegree    | .095      |     | .000                       | .831                       | .384                       | .004                       | .036                       | .005                       | .552                | .154            | .001            | .000            |
|                                     |           |     |                            |                            |                            |                            |                            |                            |                     |                 |                 |                 |
|                                     |           |     |                            |                            |                            |                            |                            |                            |                     |                 |                 |                 |
|                                     |           |     |                            |                            |                            |                            |                            |                            |                     |                 |                 |                 |

Significant if  $p < 0.003$  (0.05/18)
